# Supplementary material
Source: PubMed Central journal article supplement (PMC4396870)
Supplement: NIHMS586121-supplement-01.pdf [file NIHMS586121-supplement-01.pdf]

## **SUPPLEMENTAL MATERIAL**

**Supplemental Figure.**

**Figure S1. Study Flow-Chart.**

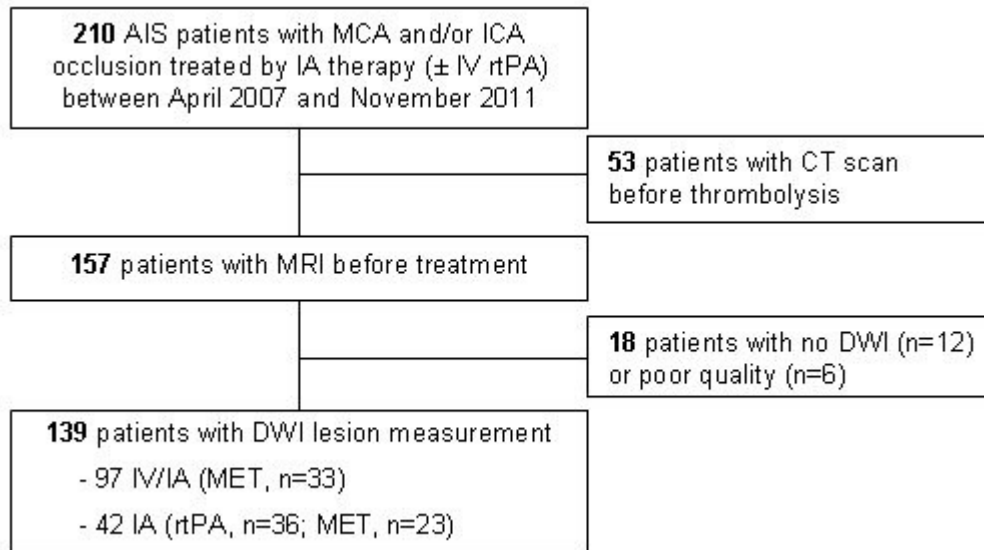

Abbreviations : MCA = middle cerebral artery; ICA = internal carotid artery; IV = intravenous; IA = intra-arterial; rtPA = recombinant tissue plasminogen activator; CT scan = computed tomography scan; MRI = magnetic resonance imaging; DWI = diffusion-weighted imaging; MET = mechanical endovascular therapy.

**Supplemental table 1. Rates of Favorable Outcome by TIMI Flow Grades, Overall and According to DWI Lesion Volume Subgroups.**

|                             | <b>TIMI 0-1<br/>(n=35)</b> | <b>TIMI 2<br/>(n=39)</b> | <b>TIMI 3<br/>(n=64)</b> | <b>P</b> |
|-----------------------------|----------------------------|--------------------------|--------------------------|----------|
| Overall                     | 6 (17.1)                   | 14 (35.9)                | 46 (71.9)                | <0.001   |
| DWI Lesion Volume, tertiles |                            |                          |                          |          |
| <8 cc                       | 2 (28.6)                   | 8 (66.7)                 | 19 (73.1)                | 0.12     |
| 8-32 cc                     | 4 (23.5)                   | 2 (25.0)                 | 17 (77.3)                | 0.001    |
| >32 cc                      | 0 (0.0)                    | 4 (21.1)                 | 10 (62.5)                | <0.001   |
| MRA-DWI mismatch status     |                            |                          |                          |          |
| Yes *                       | 5 (23.8)                   | 10 (52.6)                | 29 (70.7)                | 0.002    |
| No                          | 1 (7.1)                    | 4 (20.0)                 | 17 (73.9)                | <0.001   |
| NIHSS-DWI mismatch criteria |                            |                          |                          |          |
| NIHSS≥8 and volume ≤25 cc   | 5 (27.8)                   | 4 (44.4)                 | 22 (66.7)                | 0.027    |
| NIHSS≥8 and volume >25 cc   | 0 (0.0)                    | 4 (21.1)                 | 13 (68.4)                | <0.001   |
| NIHSS<8                     | 1 (25.0)                   | 2 (100.0)                | 11 (91.7)                | 0.036    |
| Very large DWI lesion group |                            |                          |                          |          |
| Volume ≤70 cc               | 6 (19.4)                   | 13 (41.9)                | 43 (75.4)                | <0.001   |
| Volume >70 cc               | 0 (0.0)                    | 1 (12.5)                 | 3 (42.9)                 | 0.28     |

Data are no. (%) of patients with outcomes unless otherwise indicated. Comparisons in favorable outcome between TIMI flow grades were done Fisher's exact test. \* DEFUSE model (volume<25cc for ICA or MCA-M1 occlusion and volume <15cc for MCA-M2 occlusion)

Abbreviations :DWI = diffusion-weighted imaging; MRA = magnetic resonance angiography; NA=not applicable; NIHSS = national institutes of health stroke scale; TIMI = thrombolysis in myocardial infarction.

**Supplemental table 2. Rates of 90-day mortality by TIMI Flow Grades, Overall and According to DWI Lesion Volume Subgroups.**

|                             | <b>TIMI 0-1<br/>(n=35)</b> | <b>TIMI 2<br/>(n=39)</b> | <b>TIMI 3<br/>(n=64)</b> | <b>P</b> |
|-----------------------------|----------------------------|--------------------------|--------------------------|----------|
| Overall                     | 18 (51.4)                  | 11 (28.2)                | 7 (10.9)                 | <0.001   |
| DWI Lesion Volume, tertiles |                            |                          |                          |          |
| <8 cc                       | 3 (42.9)                   | 0 (0.0)                  | 4 (15.4)                 | 0.039    |
| 8-32 cc                     | 7 (41.2)                   | 3 (37.5)                 | 0 (0.0)                  | 0.001    |
| >32 cc                      | 8 (72.7)                   | 8 (42.1)                 | 3 (18.8)                 | 0.021    |
| MRA-DWI mismatch status     |                            |                          |                          |          |
| Yes *                       | 8 (38.1)                   | 2 (10.5)                 | 4 (9.8)                  | 0.022    |
| No                          | 10 (71.4)                  | 9 (45.0)                 | 3 (13.0)                 | 0.001    |
| NIHSS-DWI mismatch criteria |                            |                          |                          |          |
| NIHSS≥8 and volume ≤25 cc   | 6 (33.3)                   | 3 (16.7)                 | 3 (9.1)                  | 0.11     |
| NIHSS≥8 and volume >25 cc   | 10 (76.9)                  | 8 (42.1)                 | 3 (15.8)                 | <0.001   |
| NIHSS<8                     | 2 (50.0)                   | 0 (0.0)                  | 1 (8.3)                  | 0.13     |
| Very large DWI lesion group |                            |                          |                          |          |
| Volume ≤70 cc               | 14 (45.2)                  | 5 (16.1)                 | 5 (8.8)                  | <0.001   |
| Volume >70 cc               | 4 (100.0)                  | 6 (75.0)                 | 2 (28.6)                 | 0.046    |

Data are no. (%) of patients with outcomes unless otherwise indicated. Comparisons in favorable outcome between TIMI flow grades were done Fisher's exact test. \* DEFUSE model (volume<25cc for ICA or MCA-M1 occlusion and volume <15cc for MCA-M2 occlusion)

Abbreviations :DWI = diffusion-weighted imaging; MRA = magnetic resonance angiography; NA=not applicable; NIHSS = national institutes of health stroke scale; TIMI = thrombolysis in myocardial infarction.

**Supplemental table 3. Rates of Hemorrhagic transformation by TIMI Flow Grades, Overall and According to DWI Lesion Volume Subgroups.**

|                                        | <b>TIMI 0-1<br/>(n=35)</b> | <b>TIMI 2<br/>(n=39)</b> | <b>TIMI 3<br/>(n=64)</b> | <b>P</b> |
|----------------------------------------|----------------------------|--------------------------|--------------------------|----------|
| Overall                                | 11 (31.4)                  | 12 (30.8)                | 8 (12.3)                 | 0.028    |
| DWI Lesion Volume, tertiles            |                            |                          |                          |          |
| <8 cc                                  | 2 (28.6)                   | 1 (8.3)                  | 0 (0.0)                  | 0.033    |
| 8-32 cc                                | 4 (23.5)                   | 2 (25.0)                 | 4 (18.2)                 | 0.81     |
| >32 cc                                 | 5 (45.5)                   | 9 (47.4)                 | 4 (25.0)                 | 0.39     |
| MRA-DWI mismatch status                |                            |                          |                          |          |
| Yes *                                  | 5 (23.8)                   | 2 (10.5)                 | 4 (9.5)                  | 0.27     |
| No                                     | 6 (42.9)                   | 10 (50.0)                | 4 (17.4)                 | 0.064    |
| NIHSS-DWI mismatch criteria            |                            |                          |                          |          |
| NIHSS $\geq$ 8 and volume $\leq$ 25 cc | 5 (27.8)                   | 3 (16.7)                 | 4 (11.8)                 | 0.39     |
| NIHSS $\geq$ 8 and volume >25 cc       | 6 (46.2)                   | 9 (47.4)                 | 4 (21.1)                 | 0.20     |
| NIHSS<8                                | 0 (0.0)                    | 0 (0.0)                  | 0 (0.0)                  | -        |
| Very large DWI lesion group            |                            |                          |                          |          |
| Volume $\leq$ 70 cc                    | 10 (32.3)                  | 10 (32.3)                | 5 (8.6)                  | 0.004    |
| Volume >70 cc                          | 1 (25.0)                   | 2 (25.0)                 | 3 (42.9)                 | 0.83     |

Data are no. (%) of patients with outcomes unless otherwise indicated. Comparisons in favorable outcome between TIMI flow grades were done Fisher's exact test. \* DEFUSE model (volume<25cc for ICA or MCA-M1 occlusion and volume <15cc for MCA-M2 occlusion)

Abbreviations :DWI = diffusion-weighted imaging; MRA = magnetic resonance angiography; NA=not applicable; NIHSS = national institutes of health stroke scale; TIMI = thrombolysis in myocardial infarction.
